# Supplementary material for: A wash-free, elution-free and low protein adsorption paper-based material for nucleic acid extraction
Source: Royal Society of Chemistry journal article supplement (doi:10.1039/d3ay00695f), 2023-01-01
Supplement: d3ay00695f1.pdf [file d3ay00695f1.pdf]

## **A wash-free, elution-free and low protein adsorption paper-based material for nucleic acid extraction**

Ruihua Tang<sup>1,2\*</sup>, Xueyan Yan<sup>1,2</sup>, Min Li<sup>1,2</sup>, Aoqi Du<sup>1,2</sup>, Hui Yang<sup>3</sup>, Huancai Yin<sup>4</sup>,  
Mingyue Xie<sup>1,2</sup>

<sup>1</sup> *College of Bioresources Chemical and Materials Engineering, Shaanxi University of Science & Technology, Xi'an 710021, P.R. China*

<sup>2</sup> *National Demonstration Center for Experimental Light Chemistry Engineering Education, Shaanxi University of Science & Technology, Xi'an 710021, P. R. China*

<sup>3</sup> *School of Life Sciences, Northwestern Polytechnical University, Xi'an 710072, People's Republic of China*

<sup>4</sup> *CAS Key Lab of Bio-Medical Diagnostics, Suzhou Institute of Biomedical Engineering and Technology, Chinese Academy of Sciences, Suzhou 215163, China*

\* *Corresponding authors: [tangruihua@163.com](mailto:tangruihua@163.com)*

**Table S1 The sequence of human GAPDH**

| Sample | Gene  |         | Sequence (5'-3')        | Product |
|--------|-------|---------|-------------------------|---------|
| Human  | GAPDH | Forward | TCCTGCACCACCAACTGCTTAGC | 254bp   |
| Blood  |       | primer  |                         |         |
|        |       | Reverse | ACACGGAAGGCCATGCCAGTGAG |         |
|        |       | primer  |                         |         |
